# Supplementary material for: [(C⁁N⁁N)Pt(CC)nR] (HC⁁N⁁N = 6-aryl-2,2′-bipyridine, n = 1–4, R = aryl, SiMe3) as a new class of light-emitting materials and their applications in electrophosphorescent devicesElectronic supplementary information (ESI) available: General experimental procedure, analytical and spectral characterizations, OLED fabrication and performance. See http://www.rsc.org/suppdata/cc/b1/b108793b/
Source: Royal Society of Chemistry journal article supplement (doi:10.1039/b108793b), 2002-01-07
Supplement: b108793b.doc [file b108793b.doc]

**Supplementary Information for *Chem. Commun.***

**[(C^N^N)Pt(CC)nR] (HC^N^N = 6-aryl-2,2'-bipyridine, n = 1–4, R = aryl, SiMe3) as a new class of light-emitting materials and their applications in electrophosphorescent devices**

**Wei Lu,*a* Bao-Xiu Mi,*b* Michael C. W. Chan,*a* Zheng Hui,*a* Nian-Yong Zhu,*a* Shuit-Tong Lee,*b* and Chi-Ming Che**a***

***a*** *Department of Chemistry and HKU-CAS Joint Laboratory on New Materials, The University of Hong Kong, Pokfulam Road, Hong Kong SAR, China. Email: cmche@hku.hk*

***b*** *Centre of Super-Diamond and Advanced Films and Department of Physics and Materials Science, City University of Hong Kong, Kowloon, Hong Kong SAR, China*

General experimental procedure, syntheses and characterization of complexes **1**–**13**, and OLED fabrication and performance.

**General Experimental Procedure**

Infrared spectra were recorded on a BIO RAD FT-IR spectrometer. Fast atom bombardment (FAB) mass spectra were obtained on a Finnigan Mat 95 mass spectrometer. 1H NMR spectra were recorded on DPX300 Bruker FT-NMR spectrometer with chemical shifts (in ppm) relative to tetramethylsilane. Elemental analyses were performed by the Institute of Chemistry at Chinese Academy of Sciences, Beijing. UV-vis spectra were recorded on a Perkin-Elmer Lambda 19 UV/vis spectrophotometer. Emission spectra were obtained on a SPEX Fluorolog-2 Model F11 fluorescence spectrophotometer. Emission lifetime measurements were performed with a Quanta Ray DCR-3 pulsed Nd:YAG laser system (pulse output 355 nm, 8 ns). Luminescent quantum yields were referenced to tris(2,2'-bipyridyl)ruthenium(II) in acetonitrile ( = 0.062) and extrapolated to infinite dilution. Estimated error is  15 %. Self-quenching studies were performed by luminescence lifetime measurements over a range of complex concentrations (5  10-6 to 5  10-4 M) and fitted by a modified Stern-Volmer expression (eq 1),

0/obs = 1 + kq0[Pt] (eq 1)

where kq is the self-quenching rate constant, [Pt] is the concentration of Pt complex, and 0 and obs are the lifetime of the chromophore in infinite dilution and known concentration, respectively. The radiative rate constants were calculated using eq 2,

kr = 00-1 (eq 2)

where kr is the radiative rate constant, 0 and 0 are the luminescence quantum yield and lifetime of the chromophore in infinite dilution, respectively.

**Characterization of the complexes**

A mixture of the Cl-ligated PtII precursor (0.33 mmol), RCCH or RCCCu (1 mmol), Et3N (3 mL) and CuI (5 mg) in degassed CH2Cl2 (30 mL) was stirred for 12 h under a nitrogen atmosphere at room temperature in the absence of light. The resulted mixture was evaporated to dryness under reduced pressure. The crude product was purified by flash chromatography (neutral Al2O3, CH2Cl2 as eluent) and recrystallized from dichloromethane/diethyl ether.

**[(C^N^N)Pt(CCC6H5)] (1):** orange crystalline powder. IR (Nujol):  = 2107 (w, CC) cm-1. FAB MS: 528 (M+ + H), 527 (M+); 1H NMR (300 MHz, CDCl3, 22 ºC):  9.15 (d, 1H, *J* = 4.3 Hz), 7.97 (m, 2H), 7.85 (d, 1H, *J* = 8.1 Hz), 7.75 (t, 1H, *J* = 8.0 Hz), 7.55 (m, 3H), 7.48 (m, 2H), 7.31 (m, 3H), 7.17 (t, 2H, *J* = 7.0 Hz), 7.05 (t, 1H, *J* = 7.4 Hz); 13C NMR (*d*6-DMSO, 22 ºC):  163.8, 157.3, 154.0, 150.5, 146.9, 142.2, 139.8, 139.7, 137.3, 130.8, 130.4, 128.6, 128.3, 127.8, 124.7, 123.8, 123.3, 119.1, 118.9, 108.1, 104.8. elemental analysis calcd (%) for C24H16N2Pt: C 54.65, H 3.06, N 5.31; found: C 54.04, H 3.40, N 5.75.

**[(C^N^N)Pt(CCC6H4Me-4)] (2):** orange-red crystalline powder. IR (Nujol):  = 2105 (w, CC) cm-1. FAB MS: 542 (M+ + H), 541 (M+); 1H NMR (300 MHz, CDCl3, 22 ºC):  9.07 (d, 1H, *J* = 4.3 Hz), 7.92 (m, 2H), 7.82 (d, 1H, *J* = 7.8 Hz), 7.69 (t, 1H, *J* = 8.0 Hz), 7.53 (d, 1H, *J* = 7.3 Hz), 7.43 (m, 4H), 7.27 (d, 1H, *J* = 6.3 Hz), 7.15 (t, 1H, *J* = 7.3 Hz), 7.10 (d, 2H, *J* = 7.9 Hz), 7.02 (t, 1H, *J* = 7.5 Hz), 2.35 (s, 3H). elemental analysis calcd (%) for C25H18N2Pt: C 55.45, H 3.35, N 5.17; found: C 55.91, H 3.39, N 4.87.

[**(C^N^N)Pt(CCC6H4OCH3-4)] (3):** red crystalline powder. IR (Nujol):  = 2098 (w, CC) cm-1. FAB MS: 558 (M+ + H), 557 (M+); 1H NMR (300 MHz, CDCl3, 22 ºC):  9.12 (d, 1H, *J* = 5.2 Hz), 7.95 (m, 2H), 7.83 (d, 1H, *J* = 7.9 Hz), 7.72 (t, 1H, *J* = 8.0 Hz), 7.50 (m, 3H), 7.49 (d, 2H, *J* = 8.8 Hz), 7.30 (d, 1H, *J* = 6.6 Hz), 7.16 (t, 1H, *J* = 7.4 Hz), 7.03 (t, 2H, *J* = 7.4 Hz), 6.84 (d, 2H, *J* = 8.8 Hz), 3.82 (s, 3H). elemental analysis calcd (%) for C25H18N2OPt: C 53.86, H 3.25, N 5.02; found: C 53.87, H 3.18, N 4.68.

**[(C^N^N)Pt(CCC6H4Cl-4)] (4):** orange-red crystalline powder. IR (Nujol):  = 2094 (w, CC) cm-1. FAB MS: 562 (M+); 1H NMR (300 MHz, CDCl3, 22 ºC):  9.05 (d, 1H, *J* = 5.1 Hz), 7.94 (t, 1H, *J* = 7.8 Hz), 7.87 (d, 1H, *J* = 7.5 Hz), 7.81 (d, 1H, *J* = 7.9 Hz), 7.71 (t, 1H, *J* = 8.0 Hz), 7.52 (d, 1H, *J* = 7.7 Hz), 7.46 (m, 2H), 7.45 (d, 1H, *J* = 8.5 Hz), 7.27 (d, 1H, *J* = 4.2 Hz), 7.23 (d, 2H, *J* = 8.8 Hz), 7.15 (t, 1H, *J* = 7.4 Hz), 7.03 (t, 1H, *J* = 7.4 Hz). elemental analysis calcd (%) for C24H15N2ClPt: C 51.30, H 2.69, N 4.99; found: C 51.59, H 2.68, N 4.68.

**[(C^N^N)Pt(CCC6H4F-4)] (5):** black-red crystals. IR (Nujol):  = 2097 (w, CC) cm-1. FAB MS: 546 (M+ + H), 545 (M+); 1H NMR (300 MHz, CDCl3, 22 ºC):  9.12 (d, 1H, *J* = 5.2 Hz), 7.97 (t, 1H, *J* = 7.9 Hz), 7.92 (d, 1H, *J* = 7.6 Hz), 7.84 (d, 1H, *J* = 8.0 Hz), 7.74 (t, 1H, *J* = 8.0 Hz), 7.56-7.47 (m, 5H), 7.32 (d, 1H, *J* = 7.6 Hz), 7.17 (t, 1H, *J* = 7.4 Hz), 7.05 (t, 1H, *J* = 7.5 Hz), 6.98 (pseudo-t, 2H, *J* = 7.7 Hz). elemental analysis calcd (%) for C24H15N2FPt: C 52.85, H 2.77, N 5.14; found: C 52.77, H 2.60, N 4.86.

**[(C^N^N)Pt(CCC6H4NO2-4)] (6):** orange crystalline powder. IR (Nujol):  = 2093 (w, CC) cm-1. FAB MS: 573 (M+ + H), 572 (M+); 1H NMR (300 MHz, *d*6-DMSO, 22 ºC, TMS):  = 8.98 (d, 1H, *J* = 4.5 Hz), 8.48 (d, 1H, *J* = 8.0 Hz), 8.32 (t, 1H, *J* = 8.0 Hz), 8.20 (d, 1H, *J* = 7.4 Hz), 8.14 (d, 2H, *J* = 8.8 Hz), 8.11 (t, 1H, *J* = 8.0 Hz), 7.99 (d, 1H, *J* = 7.8 Hz), 7.83 (t, 1H, *J* = 7.5 Hz), 7.68 (d, 1H, *J* = 7.3 Hz), 7.62 (d, 1H, *J* = 7.4 Hz), 7.58 (d, 2H, *J* = 8.9 Hz), 7.11 (t, 1H, *J* = 7.3 Hz), 7.05 (t, 1H, *J* = 7.3 Hz). elemental analysis calcd (%) for C24H15N3O2Pt: C 50.35, H 2.64, N 7.34; found: C 49.95, H 2.66, N 7.56.

**[(C^N^N)Pt(CC)2C6H5] (7):** orange red crystalline powder. IR (Nujol):  = 2174, 2055 (w, CC) cm-1. FAB MS: 552 (M+ + H), 551 (M+); 1H NMR (300 MHz, *d*6-DMSO, 22 ºC, TMS):  = 8.91 (d, 1H, *J* = 4.7 Hz), 8.49 (d, 1H, *J* = 8.0 Hz), 8.34 (t, 1H, *J* = 7.9 Hz), 8.21 (d, 1H, *J* = 7.8 Hz), 8.11 (t, 1H, *J* = 8.0 Hz), 7.99 (d, 1H, *J* = 7.9 Hz), 7.86 (t, 1H, *J* = 6.5 Hz), 7.61 (t, 2H, *J* = 7.3 Hz), 7.48–7.44 (m, 2H), 7.37–7.33 (m, 3H), 7.13 (t, 1H, *J* = 7.2 Hz), 7.06 (t, 1H, *J* = 7.4 Hz). 13C NMR (*d*6-DMSO, 22 ºC):  166.3, 159.5, 156.7, 153.2, 149.3, 143.6, 142.8, 142.6, 139.6, 134.1, 133.0, 131.0, 130.8, 129.9, 127.3, 126.4, 126.2, 125.7, 121.7, 121.5, 111.5, 88.8, 81.9, 71.8. elemental analysis calcd (%) for C26H16N2Pt: C 56.62, H 2.92, N 5.08; found: C 56.13, H 2.85, N 4.82.

**[(C^N^N)Pt(CCSiMe3)]** (**8):** orange crystalline powder. IR (Nujol):  (cm-1) 2034 (w, CC). FAB MS: 524 (M+ + H), 523 (M+); 1H NMR (300 MHz, CDCl3, 22 ºC):  9.02 (d, 1H, *J* = 5.3 Hz), 7.94 (t, 1H, *J* = 7.8 Hz), 7.87 (d, 1H, *J* = 7.4 Hz), 7.82 (d, 1H, *J* = 8.0 Hz), 7.68 (t, 1H, *J* = 8.0 Hz), 7.51 (d, 1H, *J* = 7.7 Hz), 7.45 (t, 1H, *J* = 7.5 Hz), 7.41 (d, 1H, *J* = 8.1 Hz), 7.21 (d, 1H, *J* = 7.2 Hz), 7.15 (t, 1H, *J* = 7.4 Hz), 7.02 (t, 1H, *J* = 7.5 Hz), 0.27 (s, 9H); 13C NMR (*d*6-DMSO, 22 ºC):  166.3, 159.7, 156.5, 152.6, 149.3, 144.4, 142.4, 139.7, 132.9, 132.5, 130.8, 127.1, 126.3, 125.8, 121.5, 121.3, 109.4, 107.8, 4.1. elemental analysis calcd (%) for C21H20N2SiPt: C 48.18, H 3.85, N 5.35; found: C 47.72, H 3.90, N 5.01.

**[(C^N^N)Pt(CC)2SiMe3] (9):** orange crystalline powder. IR (Nujol):  (cm-1) 2184 (w, CC), 2121 (m, CC). FAB MS: 548 (M+ + H), 547 (M+); 1H NMR (300 MHz, DMSO-*d*6, 22 ºC):  8.84 (d, 1H, *J* = 4.6 Hz), 8.47 (d, 1H, *J* = 8.0 Hz), 8.33 (t, 1H, *J* = 7.7 Hz), 8.19 (d, 1H, *J* = 7.8 Hz), 8.10 (t, 1H, *J* = 8.0 Hz), 7.99 (d, 1H, *J* = 7.9 Hz), 7.83 (t, 1H, *J* = 6.0 Hz), 7.61 (d, 1H, *J* = 7.3 Hz), 7.53 (d, 1H, *J* = 7.2 Hz), 7.12 (t, 1H, *J* = 7.3 Hz), 7.05 (t, 1H, *J* = 7.2 Hz), 0.16 (s, 9H); 13C NMR (*d*6-DMSO, 22 ºC):  166.3, 159.5, 156.7, 153.2, 149.2, 143.5, 142.8, 142.6, 139.5, 133.0, 131.0, 127.3, 126.4, 126.2, 121.7, 121.5, 106.7, 96.5, 89.7, 77.8, 2.5. elemental analysis calcd (%) for C23H20N2SiPt: C 50.45, H 3.68, N 5.12; found: C 50.88, H 3.64, N 5.02.

**[(C^N^N)Pt(CC)3SiMe3] (10):** red plates. IR (Nujol):  (cm-1) 2140 (m, CC), 2005 (m, CC). FAB MS: 572 (M+ + H), 571 (M+); 1H NMR (300 MHz, DMSO-*d*6, 22 ºC):  8.81 (d, 1H, *J* = 4.8 Hz), 8.49 (d, 1H, *J* = 8.0 Hz), 8.35 (t, 1H, *J* = 7.8 Hz), 8.21 (d, 1H, *J* = 7.8 Hz), 8.13 (t, 1H, *J* = 7.9 Hz), 7.99 (d, 1H, *J* = 7.9 Hz), 7.84 (t, 1H, *J* = 6.2 Hz), 7.63 (d, 1H, *J* = 7.1 Hz), 7.48 (d, 1H, *J* = 6.9 Hz), 7.14–7.05 (m, 2H), 0.19 (s, 9H); 13C NMR (*d*6-DMSO, 22 ºC):  166.3, 159.4, 156.8, 153.2, 149.2, 143.1, 142.7, 139.4, 133.1, 131.1, 127.4, 126.5, 126.4, 121.8, 121.7, 111.9, 92.7, 88.3, 84.9,69.8, 56.9, 1.9. elemental analysis calcd (%) for C25H20N2SiPt·CH3OH: C 51.82, H 3.85, N 4.65; found: C 51.49, H 3.42, N 4.55.

**[(C^N^N)Pt(CC)4SiMe3] (11):** orange crystalline powder. IR (Nujol):  (cm-1) . FAB MS: 596 (M+ + H), 595 (M+); 1H NMR (300 MHz, DMSO-*d*6, 22 ºC):  8.82 (d, 1H, *J* = 5.0 Hz), 8.51 (d, 1H, *J* = 7.8 Hz), 8.36 (t, 1H, *J* = 7.9 Hz), 8.23 (d, 1H, *J* = 7.8 Hz), 8.13 (t, 1H, *J* = 7.9 Hz), 8.03 (d, 1H, *J* = 8.0 Hz), 7.85 (t, 1H, *J* = 6.4 Hz), 7.64 (d, 1H, *J* = 7.0 Hz), 7.47 (d, 1H, *J* = 7.19 Hz), 7.15–7.06 (m, 2H), 0.21 (s, 9H); elemental analysis calcd (%) for C27H20N2SiPt: C 54.45, H 3.38, N 4.70; found: C 53.77, H 3.12, N 5.32.

**[(S^N^N)Pt(CCC6H5)] (12):** brown needles. FAB MS: 534 (M+ + H), 533 (M+); 1H NMR (300 MHz, *d*6-DMSO, 22 ºC, TMS):  = 9.01 (d, 1H, *J* = 5.0 Hz), 8.46 (d, 1H, *J* = 8.2 Hz), 8.35 (t, 1H, *J* = 7.9 Hz), 8.02 (d, 1H, *J* = 7.6 Hz), 7.96 (t, 1H, *J* = 7.8 Hz), 7.85 (t, 1H, *J* = 6.4 Hz), 7.72 (d, 1H, *J* = 4.9 Hz), 7.56 (d, 1H, *J* = 7.3 Hz), 7.38 (d, 2H, *J* = 7.0 Hz), 7.29 (t, 2H, *J* = 7.6 Hz), 7.17 (t, 1H, *J* = 7.3 Hz), 7.11 (d, 1H, *J* = 4.6 Hz). 13C NMR (*d*6-DMSO, 22 ºC):  159.7, 157.1, 154.8, 150.9, 145.3, 140.8, 140.0, 138.7, 134.7, 131.0, 129.7, 128.4, 128.3, 127.8, 124.8, 124.1, 116.3, 116.1, 106.0, 102.8. elemental analysis calcd (%) for C22H14N2SPt: C 49.53, H 2.64, N 5.25; found: C 49.78, H 2.75, N 5.02.

**[(S^N^N)Pt(CCC6H4Me-4)] (13):** brown needles. FAB MS: 548 (M+ + H), 547 (M+); 1H NMR (300 MHz, *d*6-DMSO, 22 ºC, TMS):  = 9.03 (d, 1H, *J* = 5.2 Hz), 8.47 (d, 1H, *J* = 8.2 Hz), 8.34 (t, 1H, *J* = 7.2 Hz), 8.02 (d, 1H, *J* = 7.9 Hz), 7.96 (t, 1H, *J* = 7.7 Hz), 7.86 (t, 1H, *J* = 6.3 Hz), 7.73 (d, 1H, *J* = 4.9 Hz), 7.56 (d, 1H, *J* = 7.6 Hz), 7.26 (d, 2H, *J* = 7.9 Hz), 7.13 (d, 1H, *J* = 4.6 Hz), 7.11 (d, 2H, *J* = 7.9 Hz), 2.30 (s, 3H). elemental analysis calcd (%) for C23H16N2SPt: C 50.45, H 2.95, N 5.12; found: C 49.98, H 2.63, N 5.01.

**OLED Fabrication Procedure**

A number of devices were fabricated with the following configuration: glass / indium tin oxide (ITO: 30  / square) / NPB (400 Å) / Pt complex-doped CBP (200 Å) / BCP (60 Å) / Alq3 (200 Å) / Mg:Ag (2000 Å). The ITO glass substrate was cleaned with detergent and deionized water and dried in an oven for two hours. It was then treated with UV-ozone for 25 minutes before loading into a deposition chamber. The organic films of NPB, CBP/Pt complex, BCP and Alq3 were sequentially deposited onto the ITO substrate at a pressure of around 1.0  10-5 mbar. The pressure during metal complex deposition was below 9.0  10-6 mbar to minimize metal oxidation. The current–voltage–luminance characteristics and EL spectra were recorded with a computer-controlled DC power supply and a Spectrascan PR650 photometer at room temperature. The emission area of the devices is 0.1 cm2, defined by the overlapping area of the anode and cathode.

Table S1. Photo- and electroluminescence data for **1**, **2**, **12** and **13**.

| Complex | PL max, nm (0, s;  0)*a* | EL max, nm | Turn-on Voltage, V | Doping Ratio  Relative to CBP | Maximum Luminance, cd m-2 | Maximum Efficiency, cd A-1 |
| --- | --- | --- | --- | --- | --- | --- |
| **1** | 582 (0.4; 0. 037) | 564 | 3.6 | 2 %*b* | 9900*d* | 4.2*g* |
| 4 % | 7800*c* | 2.4*g* |
| **2** | 600 (0.2; 0.019) | 580 | 4.2 | 4 % | 3900*d* | 1.4*f* |
| 6 % | 2100*d* | 0.6*f* |
| **12** | 615, 600 (sh) (1.0; 0.029) | 608, 656 (sh) | 4.5 | 2 %*b* | 2000*d* | 0.7*g* |
| 4 % | 2000*d* | 0.6*g* |
| **13** | 616, 660 (sh) (0.9; 0.025) | 612, 656 (sh) | 4.5 | 4 % | 3100*e* | 1.0*f* |
| 6 % | 1800*d* | 0.5*h* |

*a*Recorded in CH2Cl2 at 298 K. *b*Weak electrofluorescence at ~440 nm from CBP was also observed. *c*At 11 V. *d*At 12 V. *e*At 13 V. *f*At 20 mA/cm2. *g*At 30 mA/cm2. *h*At 50 mA/cm2.
